# Supplementary material for: Recent Warming, Rather than Industrial Emissions of Bioavailable Nutrients, Is the Dominant Driver of Lake Primary Production Shifts across the Athabasca Oil Sands Region
Source: PubMed Central journal article supplement (PMC4852901; doi:10.1371/journal.pone.0153987), 2016-05-02
Supplement: pone.0153987.s005.pdf [file pone.0153987.s005.pdf]

|                 | <b>Kriging<br/>Range<br/>(mg/m<sup>2</sup>)</b> | <b>Kriging<br/>Range Mean<br/>(mg/m<sup>2</sup>)</b> | <b>Sampled Mean<br/>(mg/m<sup>2</sup>)</b> | <b>Difference from<br/>Sampled Mean</b> |
|-----------------|-------------------------------------------------|------------------------------------------------------|--------------------------------------------|-----------------------------------------|
| <b>DIN 1978</b> |                                                 |                                                      |                                            |                                         |
|                 | 0.0 – 3.4                                       | 1.7                                                  | 0                                          | 1.7                                     |
|                 | 3.4 – 6.8                                       | 5.1                                                  | 4.4                                        | 0.7                                     |
|                 | 6.8 – 10.2                                      | 8.5                                                  | 8.3                                        | 0.2                                     |
|                 | 10.2 – 13.6                                     | 11.9                                                 | 12.6                                       | -0.7                                    |
|                 | 13.6 – 17.0                                     | 15.3                                                 | 17.9                                       | -2.6                                    |
|                 | 17.0 – 20.4                                     | 18.7                                                 | 0                                          | 18.7                                    |
|                 | 20.4 – 23.8                                     | 22.1                                                 | 0                                          | 22.1                                    |
|                 | 23.8 – 27.2                                     | 25.5                                                 | 0                                          | 25.5                                    |
|                 | 27.2 – 30.6                                     | 28.9                                                 | 0                                          | 28.9                                    |
|                 | 30.6 – 34.0                                     | 32.3                                                 | 0                                          | 32.3                                    |
| <b>DIN 2014</b> |                                                 |                                                      |                                            |                                         |
|                 | 0 – 3.4                                         | 1.7                                                  | 0                                          | 1.7                                     |
|                 | 3.4 – 6.8                                       | 5.1                                                  | 0                                          | 5.1                                     |
|                 | 6.8 – 10.2                                      | 8.5                                                  | 4.5                                        | 4.0                                     |
|                 | 10.2 – 13.6                                     | 11.9                                                 | 11.6                                       | 0.3                                     |
|                 | 13.6 – 17.0                                     | 15.3                                                 | 17.9                                       | -2.6                                    |
|                 | 17.0 – 20.4                                     | 18.7                                                 | 0                                          | 18.7                                    |
|                 | 20.4 – 23.8                                     | 22.1                                                 | 0                                          | 22.1                                    |
|                 | 23.8 – 27.2                                     | 25.5                                                 | 0                                          | 25.5                                    |
|                 | 27.2 – 30.6                                     | 28.9                                                 | 0                                          | 28.9                                    |
|                 | 30.6 – 34.0                                     | 32.3                                                 | 0                                          | 32.3                                    |
| <b>TN 2014</b>  |                                                 |                                                      |                                            |                                         |
|                 | 0.0 – 4.6                                       | 2.3                                                  | 0                                          | 2.3                                     |
|                 | 4.6 – 9.2                                       | 6.9                                                  | 1.2                                        | 5.6                                     |
|                 | 9.2 – 13.8                                      | 11.5                                                 | 1.6                                        | 9.9                                     |
|                 | 13.8 – 18.4                                     | 16.1                                                 | 15.3                                       | 0.8                                     |
|                 | 18.4 – 23.0                                     | 20.7                                                 | 21.3                                       | -0.6                                    |
|                 | 23.0 – 27.6                                     | 25.3                                                 | 27.1                                       | -1.8                                    |
|                 | 27.6 – 32.2                                     | 29.9                                                 | 32.7                                       | -2.8                                    |
|                 | 32.2 – 36.8                                     | 34.5                                                 | 0                                          | 34.5                                    |
|                 | 36.8 – 41.4                                     | 39.1                                                 | 0                                          | 39.1                                    |
|                 | 41.4 – 46.0                                     | 43.7                                                 | 0                                          | 43.7                                    |
| <b>SRP 2014</b> |                                                 |                                                      |                                            |                                         |
|                 | 0.0 – 0.3                                       | 0.15                                                 | 0.4                                        | -0.2                                    |
|                 | 0.3 – 0.6                                       | 0.45                                                 | 1.3                                        | -0.9                                    |
|                 | 0.6 – 0.9                                       | 0.75                                                 | 0                                          | 0.8                                     |
|                 | 0.9 – 1.2                                       | 1.05                                                 | 0                                          | 1.1                                     |
|                 | 1.2 – 1.5                                       | 1.35                                                 | 0                                          | 1.4                                     |
|                 | 1.5 – 1.8                                       | 1.65                                                 | 0                                          | 1.7                                     |

|           |      |   |     |
|-----------|------|---|-----|
| 1.8 – 2.1 | 1.95 | 0 | 2.0 |
| 2.1 – 2.4 | 2.25 | 0 | 2.3 |
| 2.4 – 2.7 | 2.55 | 0 | 2.6 |
| 2.7 – 3.0 | 2.85 | 0 | 2.9 |

---

**TDP  
2014**

|           |     |     |      |
|-----------|-----|-----|------|
| 0.0 – 0.2 | 0.1 | 0   | 0.1  |
| 0.2 – 0.4 | 0.3 | 0.2 | 0.1  |
| 0.4 – 0.6 | 0.5 | 0.8 | -0.2 |
| 0.6 – 0.8 | 0.7 | 2.0 | -1.3 |
| 0.8 – 1.0 | 0.9 | 5.2 | -4.3 |
| 1.0 – 1.2 | 1.1 | 9.9 | -8.8 |
| 1.2 – 1.4 | 1.3 | 0   | 1.3  |
| 1.4 – 1.6 | 1.5 | 0   | 1.5  |
| 1.6 – 1.8 | 1.7 | 0   | 1.7  |
| 1.8 – 2.0 | 1.9 | 0   | 1.9  |

---

**TP 2014**

|        |     |     |      |
|--------|-----|-----|------|
| 0 – 1  | 0.5 | 0.8 | -0.3 |
| 1 – 2  | 1.5 | 2.3 | -0.9 |
| 2 – 3  | 2.5 | 5.0 | -2.5 |
| 3 – 4  | 3.5 | 0   | 3.5  |
| 4 – 5  | 4.5 | 0   | 4.5  |
| 5 – 6  | 5.5 | 0   | 5.5  |
| 6 – 7  | 6.5 | 0   | 6.5  |
| 7 – 8  | 7.5 | 0   | 7.5  |
| 8 – 9  | 8.5 | 0   | 8.5  |
| 9 – 10 | 9.5 | 0   | 9.5  |
