# Supplementary material for: Recent Warming, Rather than Industrial Emissions of Bioavailable Nutrients, Is the Dominant Driver of Lake Primary Production Shifts across the Athabasca Oil Sands Region
Source: PubMed Central journal article supplement (PMC4852901; doi:10.1371/journal.pone.0153987), 2016-05-02
Supplement: pone.0153987.s011.pdf [file pone.0153987.s011.pdf]

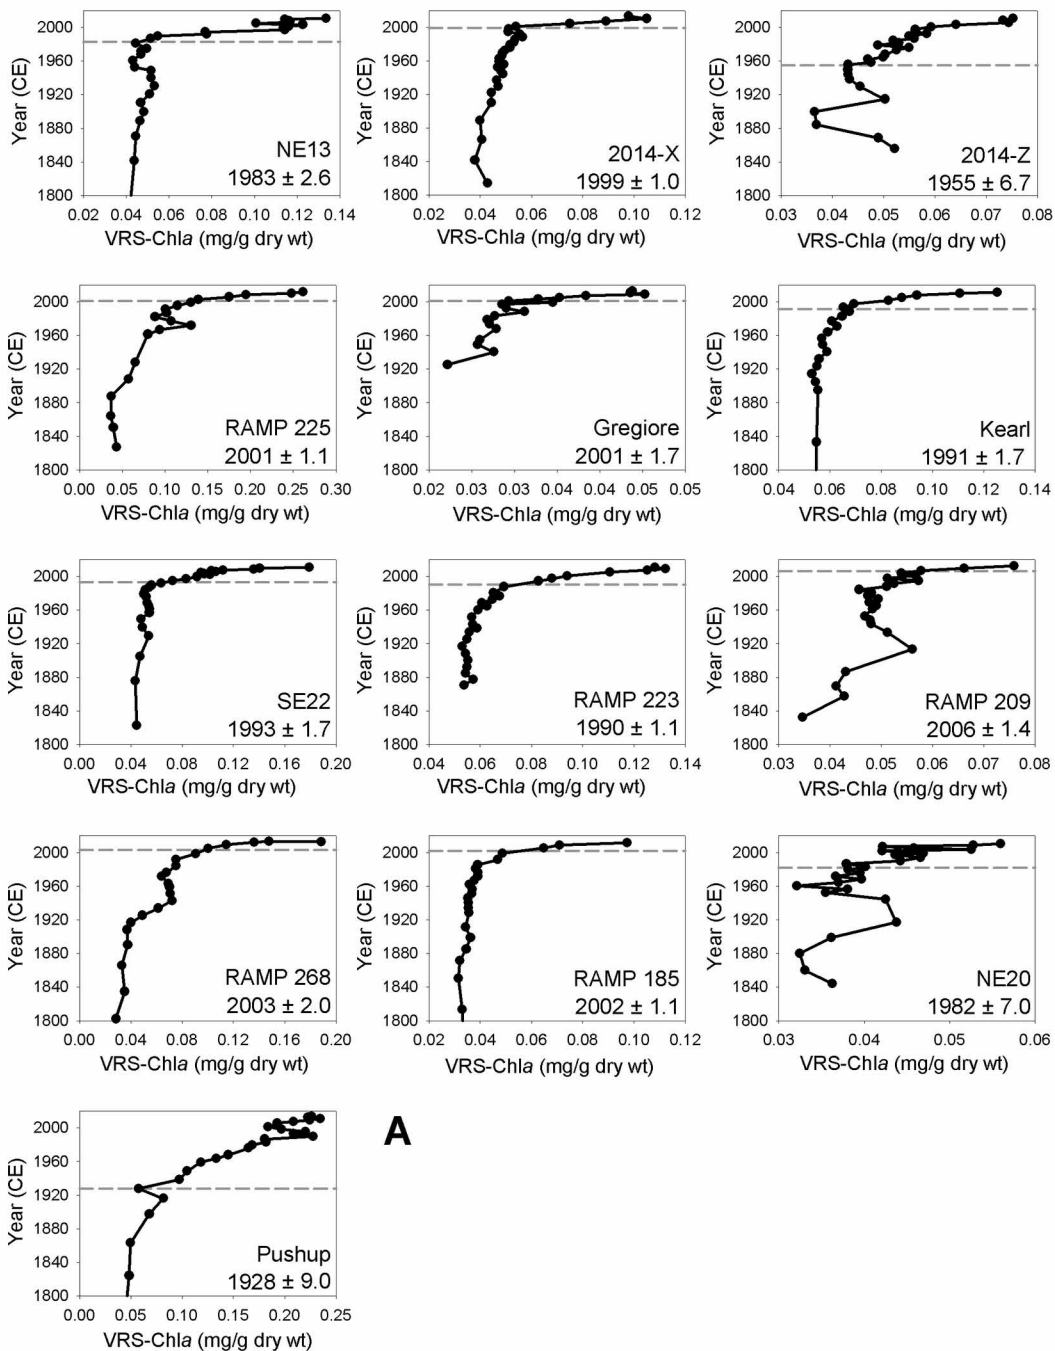

**A**

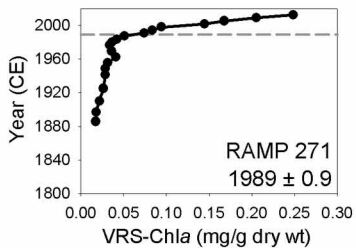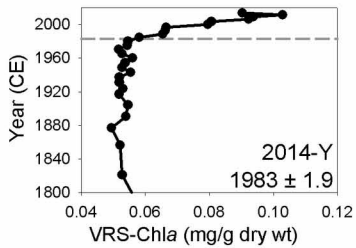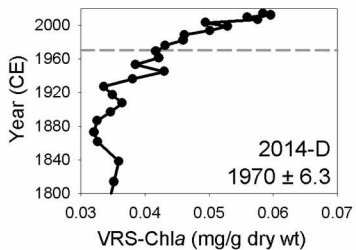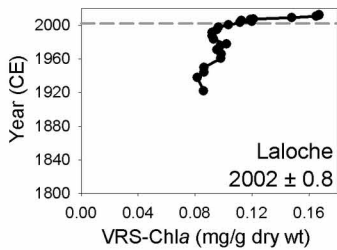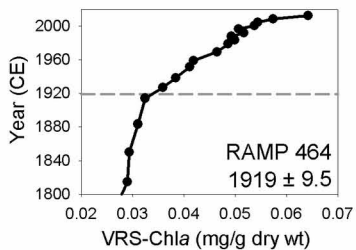

**B**

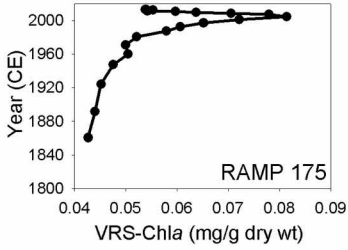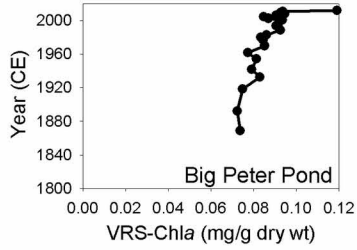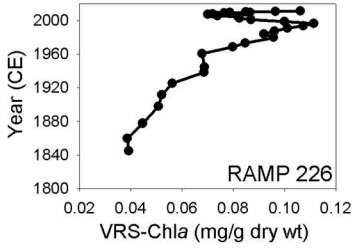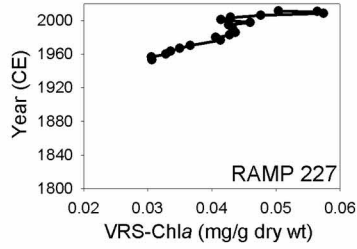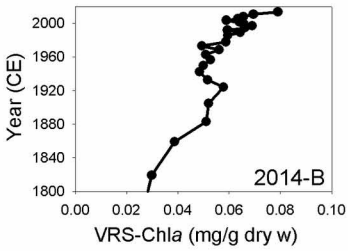

C
